# Supplementary material for: Immunological and Microbiological Profiling of Cumulative Risk Score for Periodontitis
Source: Diagnostics (Basel). 2020 Aug 5;10(8):560. doi: 10.3390/diagnostics10080560 (PMC7460115; doi:10.3390/diagnostics10080560)
Supplement: Supplementary file 1 [file diagnostics-10-00560-s001.xlsx]

## Sheet: Sheet1
Supplementary table 1. Bacterial strains used as antigens in ELISA-assays, saliva and serum dilutions and Inter-assay CVs
		Dilution					CV %
		Saliva		Serum			Saliva		Serum
Bacterial species	Strains	IgA	IgG	IgA	IgG		IgA	IgG	IgA	IgG
A. actinomycetemcomitans		01:10:00	01:10:00	1:100/1:200	1:1500/1:3000		9.1	11.2	5.4	4.7
	ATCC 29523, serotype a
	ATCC 43718, serotype b
	ATCC 33384, serotype c
	IDH 781, serotype d
	IDH 1705, serotype e
	CU 1000, serotype f*
	C59A, nonserotypeable
P. gingivalis		01:10:00	01:10:00	1:100/1:200	1:100/1:200		10.2	13.4	4.6	6.9
	ATCC 33277, serotype a
	W50, serotype b
	OMGS 434, serotype c
P. endodontalis		01:10:00	01:10:00	1:100/1:200	1:100/1:200		11.8	10.8	8.01	7.9
	ATCC 35406
P. intermedia		01:10:00	01:10:00	1:100/1:200	1:1500/1:3000		11.2	5.1	8.2	7.8
	ATCC 25611
T. forsythia		01:10:00	01:10:00	1:100/1:200	1:1500/1:3000		8.9	11.4	8.5	8.3
	ATCC 43037
P. gingivalis and A. actinomycetemcomitans antigens were a mix of listed strains.
Saliva samples were analysed with chemiluminescence immunoassay 27.
Serum samples were determined with enzyme-linked immunosorbent assay 27, 11
*Used only in the analyses of saliva samples
